# Supplementary material for: Surface aging investigation by means of an AFM-based methodology and the evolution of conservative nanoscale interactions
Source: Royal Society of Chemistry journal article supplement (doi:10.1039/c8cp03454k), 2018-01-01
Supplement: c8cp03454k1.pdf [file c8cp03454k1.pdf]

Supplementary Information to

Surface Aging Investigation by Means of AFM-  
Based Methodology and the Evolution of  
Conservative Nanoscale Interactions

Matteo Chiesa\*, Chia-Yun Lai

Laboratory for Energy and Nano-Sciences, Khalifa University of Science and Technology, Abu  
Dhabi, United Arab Emirates.

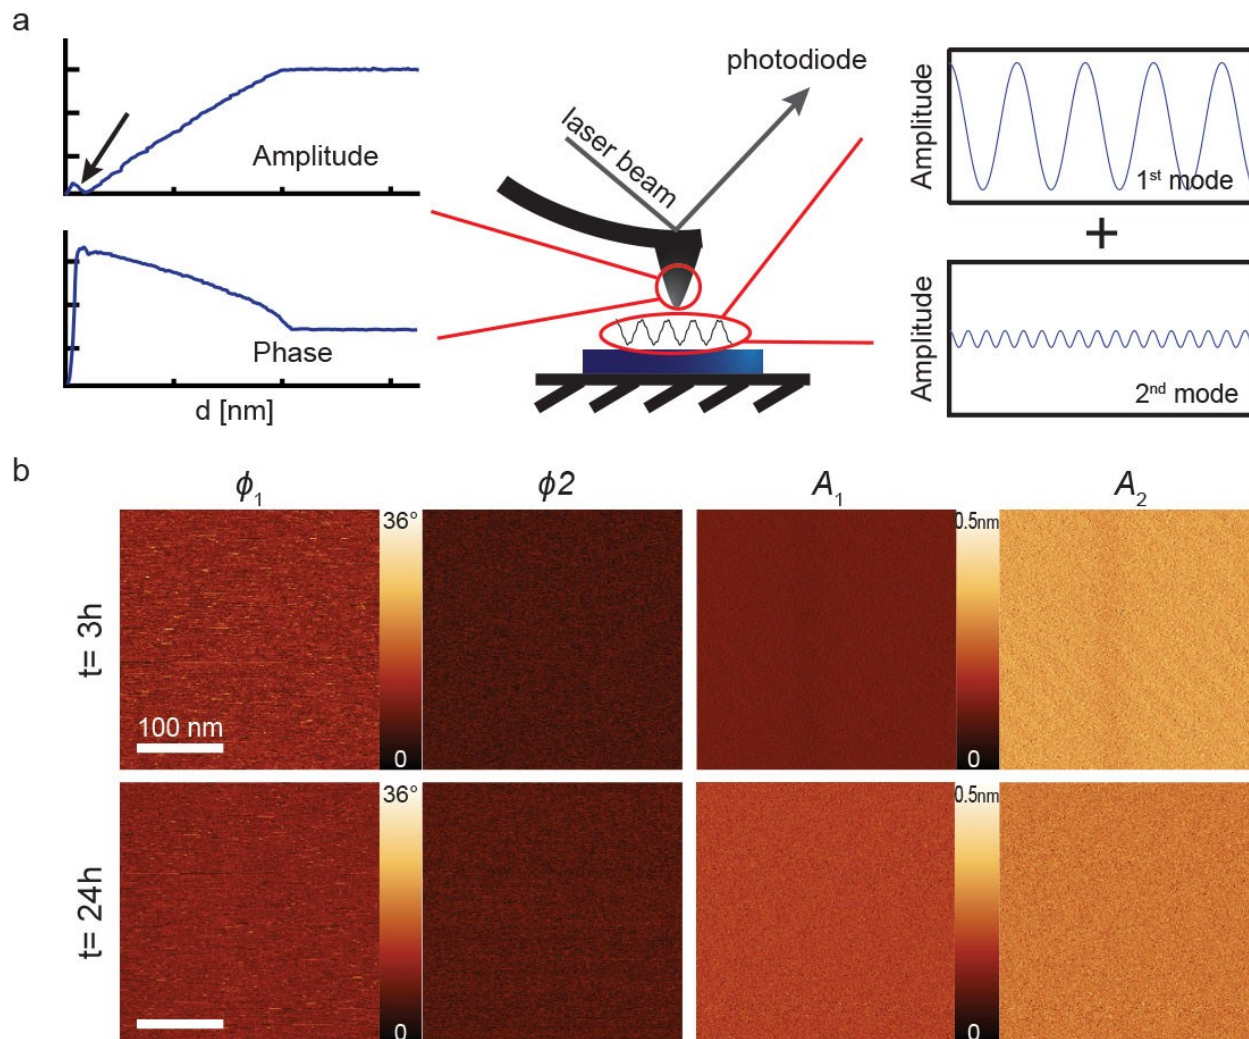

**Figure S1.** a) Amplitude  $A_1$  for the bimodal SASS (Small Amplitude and Small Set-point) is chosen in the range of the values predicted by the amplitude distance curve as shown by the arrow. The cantilever is vibrated with the 1<sup>st</sup> and 2<sup>nd</sup> mode frequency of oscillation. b) SASS images consisted of  $\Phi_1$  (phase of mode 1),  $\Phi_2$  (phase of mode 1)  $A_1$  (amplitude of mode 1) and  $A_2$  (amplitude of mode 2) after 3h and 24 h of exposure to a controlled environment (Temperature at  $23 \pm 2^\circ\text{C}$  and relative humidity (RH)  $\sim 55 \pm 5\%$ ). High homogeneity and minimal differences between the 3 h and 24 h time can be observed.

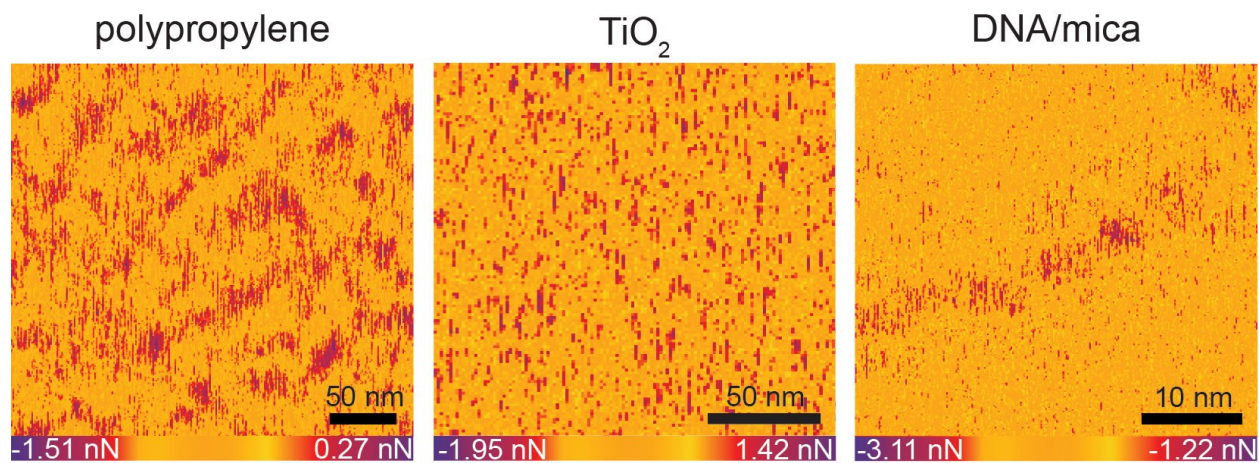

**Figure S2.** Additional force of adhesion map from a SASS bimodal experiment for three different samples including polypropylene, TiO<sub>2</sub>, and DNA on mica substrate.
